# Supplementary material for: Morphogen-defined patterning of Escherichia coli enabled by an externally tunable band-pass filter
Source: PubMed Central journal article supplement (PMC2715369; doi:10.1186/1754-1611-3-10), 2009-07-08
Supplement: 1754-1611-3-10-S1.pdf [file 1754-1611-3-10-S1.pdf]

# Morphogen-defined patterning of *Escherichia coli* enabled by an externally tunable band-pass filter

## Supplementary Information

Takayuki Sohka, Richard A. Heins and Marc Ostermeier

**Table S1. *E. coli* strains**

| <b>Strain</b> <sup>a</sup> | <b>Plasmid 1</b> <sup>b</sup> | <b>Plasmid 2</b> <sup>b</sup> | <b>Plasmid 3</b> <sup>c</sup> | <b>Ref.</b> |
|----------------------------|-------------------------------|-------------------------------|-------------------------------|-------------|
| RH01                       | pTS1                          | pDIMC8-P99bla                 | -                             | [1]         |
| RH05                       | pTS1                          | pDIMC8-MBP                    | -                             | [1]         |
| RH06                       | pTS1                          | pDIMC8-TEM1bla                | -                             | [1]         |
| RH32                       | pTS1                          | pDIMC8-TEM1bla                | pBAD-Fluor-eYFP               | this work   |
| RH37                       | pTS1                          | pDIMC8-P99bla                 | pBAD-Fluor-RFPec              | this work   |
| RH42                       | pTS1                          | pDIMC8-MBP                    | pBAD-Fluor-eCFP               | this work   |

<sup>a</sup> All strains are derived from SNO301(*ampD1*, *ampA1*, *ampC8*, *pyrB*, *recA*, *rpsL*)

<sup>b</sup> Plasmids described in Figure 1a and reference [1].

<sup>c</sup> Plasmids described in Figure 3b.

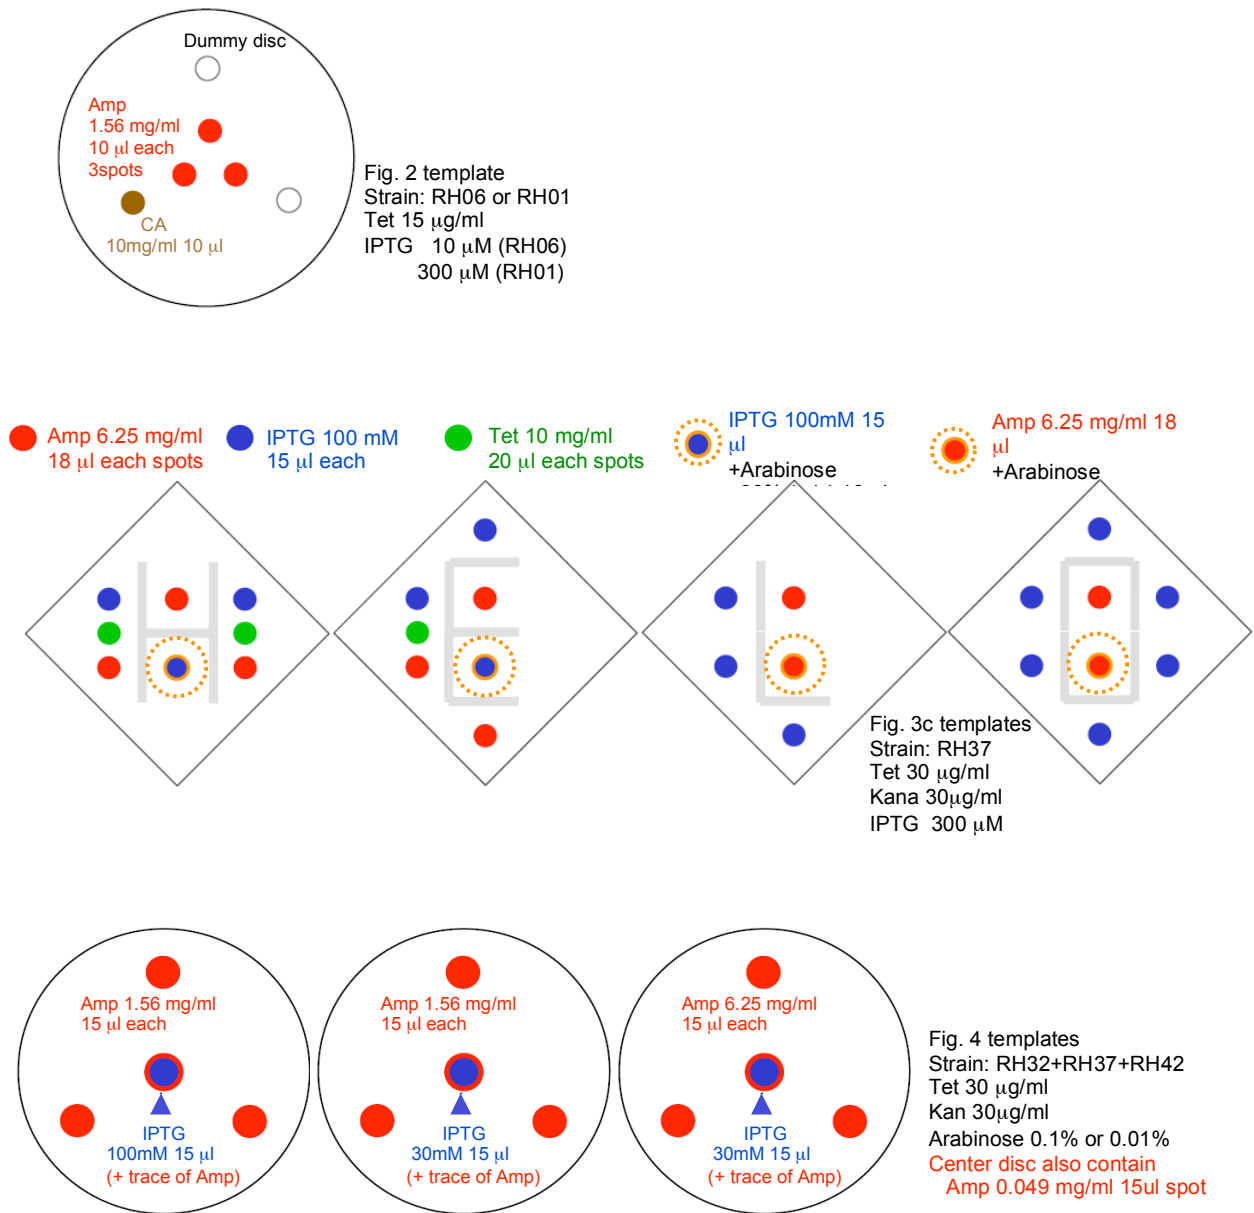

**Figure S1.** Templates for plate growth patterns. All plates contained 100 µg/ml Sm and 50 µg/ml Cm.

## References

1. Sohka T, Heins RA, Phelan RM, Greisler JM, Townsend CA, Ostermeier M; **An externally-tunable bacterial band-pass filter for enzymatic activity.** *Proc Natl Acad Sci USA* 2009, **106**:10135-10140.
